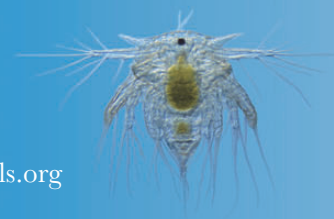

*J. Plankton Res.* (2014) 36(4): 1060–1073. First published online May 20, 2014 doi:10.1093/plankt/fbu041

# Large-scale meridional and zonal variability in the nitrogen isotopic composition of plankton in the Atlantic Ocean

ANA FERNÁNDEZ<sup>1</sup>\*, EMILIO MARAÑÓN<sup>1</sup> AND ANTONIO BODE<sup>2</sup>

<sup>1</sup>DPTO ECOLOGÍA E BIOLOGÍA ANIMAL, UNIVERSIDADE DE VIGO, VIGO E-36310, SPAIN AND <sup>2</sup>CENTRO OCEANOGRÁFICO DE A CORUÑA, INSTITUTO ESPAÑOL DE OCEANOGRAFÍA, A CORUÑA E-15080, SPAIN

\*CORRESPONDING AUTHOR: afcarrera@uvigo.es

Received August 11, 2013; accepted April 17, 2014

Corresponding editor: John Dolan

The zonal ( $\sim 15^{\circ}\text{W}$ – $40^{\circ}\text{W}$  along  $26^{\circ}\text{N}$ – $29^{\circ}\text{N}$ ) and meridional ( $\sim 30^{\circ}\text{N}$ – $30^{\circ}\text{S}$  along  $28^{\circ}\text{W}$ – $29^{\circ}\text{W}$ ) variability of  $\delta^{15}\text{N}$  of suspended particles and zooplankton ( $>40\ \mu\text{m}$ ) was studied to assess the influence of nitrogen fixation in the isotopic budget of the tropical and subtropical Atlantic ocean. Two cruises were conducted in October–November 2007 and April–May 2008 comprising a zonal and meridional transect each. In the region between  $30^{\circ}\text{N}$  and  $15^{\circ}\text{N}$ , the concurrently measured nitrogen fixation was insufficient to explain the consistent patch of suspended particles with  $\delta^{15}\text{N} < 2\text{‰}$  and points to a significant contribution of atmospheric deposition of light nitrogen to the isotopic budget. The equatorial region ( $15^{\circ}\text{N}$ – $10^{\circ}\text{S}$ ) is subject to intense nitrogen fixation, which, according to a two-end-member mixing model, may explain 40–60% of the observed  $\delta^{15}\text{N}$  in suspended particles and 3–30% in zooplankton. In the South region between  $10^{\circ}\text{S}$  and  $30^{\circ}\text{S}$ , low values ( $<4\text{‰}$ ) were measured in suspended particles and zooplankton during 2008. The values of  $\delta^{15}\text{N}$  of suspended particles suggest that nitrogen fixation, which is usually low ( $<10\ \mu\text{mol N m}^{-2}\text{ day}^{-1}$ ), may represent 50–60% of phytoplankton nitrogen in this region. Hence, diazotrophy in the South Atlantic may be more important than previously thought.

**KEYWORDS:** nitrogen isotopes;  $\delta^{15}\text{N}$ ; phytoplankton; zooplankton; diazotrophy; Atlantic Ocean

## INTRODUCTION

In many marine ecosystems, primary production is limited by the availability of nitrogen (Vitousek and Howarth, 1991; Karl *et al.*, 2002; Moore *et al.*, 2013). Reactive nitrogen is supplied to the euphotic zone by different physical, chemical and biological processes such as advective diffusion, atmospheric deposition and biological nitrogen fixation. The latter is mediated by organisms and, in the oligotrophic regions of the oceans, is a relevant source of new nitrogen (Paerl and Zehr, 2000). The ratio of stable isotopes in phytoplankton ( $^{15}\text{N}:$  $^{14}\text{N}$  expressed as  $\delta^{15}\text{N}$  in ‰) is variable, due to the contrasting preferences of the organisms for each isotope. The metabolic pathways usually discriminate against the heavy isotope ( $^{15}\text{N}$ ), this discrimination is measured by the isotopic fractionation factor (Montoya, 2008). Additionally, the different forms of inorganic nitrogen have distinct signatures of  $\delta^{15}\text{N}$ . Deep-nitrate typically ranges between 3 and 6‰ (Montoya, 2008), atmospheric dinitrogen is, by definition, 0‰, and deep-ammonium lies between 6 and 8‰ (Miyake and Wada, 1967). Hence, a very different  $\delta^{15}\text{N}$  of organic matter is expected, according to the source of nitrogen, if this is completely consumed. The isotopic signature of phytoplankton will depend then on the signature of the source of nitrogen and the degree of fractionation during uptake. Yet, the interpretation of  $\delta^{15}\text{N}$  is not so straightforward. In the case of animals (i.e. upper trophic levels), a trophic effect is also observed whereby the tissues of the consumer are usually 2–4‰ heavier than the food, whereas the animal's excreta, mainly in the form of ammonium, can be 2–4‰ lighter than the food (Montoya, 2008; and references herein). In addition, cultured cyanobacteria growing on excess nitrate showed a strong fractionation factor, yielding  $\delta^{15}\text{N}$  values similar to those produced by growth on dinitrogen (Bauersachs *et al.*, 2009).

In the Atlantic Ocean, experimental data retrieved during large-scale surveys show that *Trichodesmium*, the most well-studied diazotroph, is distributed preferentially between 0°N and 20°N (Tyrrell *et al.*, 2003; Moore *et al.*, 2009; Fernández *et al.*, 2010; Luo *et al.*, 2012). In addition, nitrogen fixation, mostly measured with the method of Montoya *et al.* (Montoya *et al.*, 1996), is more significant between 0°N and 15°N (Moore *et al.*, 2009; Fernández *et al.*, 2010; Luo *et al.*, 2012). The  $\delta^{15}\text{N}$  of diazotrophs usually ranges between –1 and –2‰ (Montoya *et al.*, 2002). However, the measured isotopic signature of nitrogen in suspended particles and the biogeochemical estimates of excess nitrogen available in the literature suggest that nitrogen fixation is more relevant in a region further north, between 15°N and 30°N (Gruber and Sarmiento, 1997; Mahaffey *et al.*, 2003, 2004; Hansell *et al.*, 2004;

Reynolds *et al.*, 2007). The time scales reflected by these measurements are different: *in situ* nitrogen fixation rates generally represent instantaneous rates over a few hours to 1 day while  $\delta^{15}\text{N}$  and excess nitrogen are indicators of the diazotrophic activity over longer periods of days to months. However, the determinants of this disagreement remain undefined. Duce *et al.* (Duce *et al.*, 2008) argued that the atmospheric deposition of reactive nitrogen in the oceans has increased due to human activities and is fast approaching the marine  $\text{N}_2$  fixation budget. Other studies have also shown an increase of the atmospheric deposition of  $^{15}\text{N}$ -depleted nitrogen in high and temperate latitudes (Hastings *et al.*, 2009; Mara *et al.*, 2009; Morin *et al.*, 2009; Holtgrieve *et al.*, 2011), as a result of the increasing anthropogenic production of reactive nitrogen and/or natural speciation processes. In addition, Baker *et al.* (Baker *et al.*, 2007) and Knapp *et al.* (Knapp *et al.*, 2010) reported depositional fluxes of low  $\delta^{15}\text{N}$  similar to measured  $\text{N}_2$  fixation rates in the Atlantic Ocean.

As part of a wider project, we have previously described the latitudinal and longitudinal distribution of measured community nitrogen fixation in the tropical and subtropical Atlantic Ocean (Fernández *et al.*, 2010, 2013) and the relative contribution of nitrogen fixation and nitrate eddy diffusion in supplying new nitrogen to the euphotic layer (Mouriño-Carballido *et al.*, 2011). Here, we report on the distribution of  $\delta^{15}\text{N}$  in suspended particles and two size-fractions of plankton, with the aim of describing the large-scale latitudinal variability of nitrogen isotopic signatures in the Atlantic Ocean and comparing these inferred patterns of diazotrophy with concurrent, direct measurements of *in situ*  $\text{N}_2$  fixation rates.

## METHOD

### Sampling, hydrography and chlorophyll *a*

Two research cruises were conducted in the tropical and subtropical Atlantic Ocean during 17 November–8 December 2007 and 13 April–2 May 2008 on board the BIO “Hespérides.” The tracks followed by the vessel comprised a zonal and a meridional transect in each season (Fig. 1).

The vertical distribution of temperature, salinity, dissolved oxygen and fluorescence was measured by an SBE 911plus CTD attached to a rosette equipped with 12-L Niskin bottles that were fired to 300 m depth, always before dawn. The vertical profiles of fluorescence and oxygen at each station were used to choose the sampling depths for the determination of inorganic nutrients concentration, chlorophyll *a* (chl-*a*) concentration, community

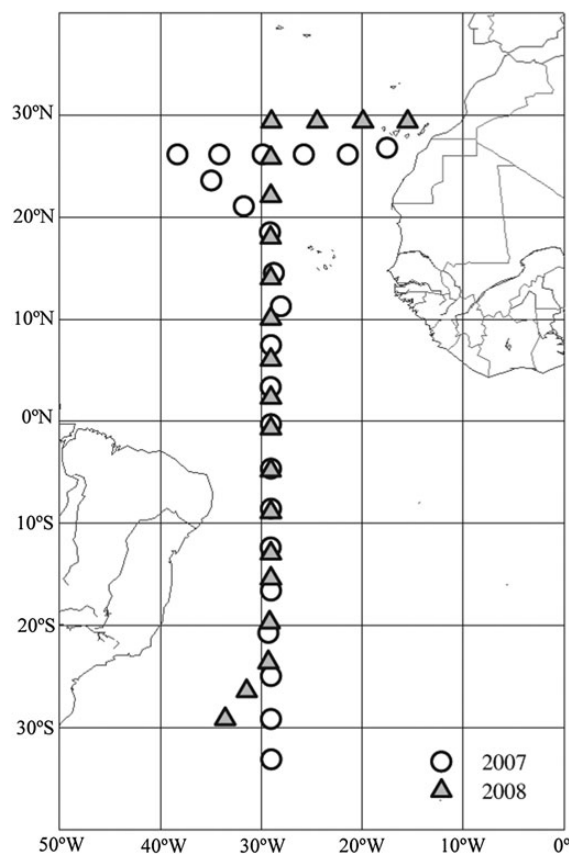

**Fig. 1.** Sampling stations during the TRYNITROP cruises on board the BIO “Hespérides.” White circles represent the autumn 2007 cruise (17 November–8 December 2007), and grey triangles the spring 2008 cruise (13 April–2 May 2008).

$^{15}\text{N}_2$  fixation and natural abundance of nitrogen isotopes in suspended particles.

The concentration of chl-*a* was measured at six to seven depths distributed through the euphotic layer. At each depth, a 250-mL sample was filtered, using low vacuum pressure, through 0.2- $\mu\text{m}$  pore-size polycarbonate filters. The pigments were extracted overnight in 90% of acetone at  $-4^\circ\text{C}$ . Fluorescence was subsequently measured on board with a Turner Designs 700 fluorometer, which was calibrated with pure chl-*a* (Fluka).

Rates of  $\text{N}_2$  fixation by the whole planktonic community in a 24-h incubation period were determined in each station at the surface (5 m), an intermediate depth (30–80 m) and the depth of the deep chlorophyll maximum (DCM) and are already described in Fernández *et al.* (Fernández *et al.*, 2010, 2013). Briefly, we incubated triplicate samples following the Montoya *et al.* (Montoya *et al.*, 1996) protocol for the  $^{15}\text{N}_2$ -uptake technique with the modifications of Rees *et al.* (Rees *et al.*, 2009). The equations of Weiss (Weiss, 1970) and Montoya *et al.* (Montoya

*et al.*, 1996) were used to calculate the initial  $\text{N}_2$  concentration (assuming equilibrium with atmosphere) and  $\text{N}_2$  fixation rates, respectively. The limit of detection, estimated following Montoya *et al.* (Montoya *et al.*, 1996), was  $0.001 \mu\text{mol N m}^{-3} \text{ day}^{-1}$ .

### Natural abundance of nitrogen isotopes in suspended particles

For the determination of  $\delta^{15}\text{N}$  signature in suspended particles ( $\delta^{15}\text{N}_{\text{sp}}$ ), 2-L samples were taken at six depths through the euphotic layer at each pre-dawn station and filtered through a 25-mm diameter GF/F filter (Whatman). All filters were dried at  $40^\circ\text{C}$  for 24 h and then stored until pelletization in tin capsules. The measurement of particulate organic nitrogen (PON) and  $^{15}\text{N}$  atom% was carried out with an elemental analyser combined with a continuous flow stable isotope mass spectrometer (FlashEA112 + Deltaplus, ThermoFinnigan) and using an acetanilide standard as reference. The limit of detection of the equipment was  $0.20 \mu\text{g N}$ .

The isotopic signature observed in the suspended particles may be affected by the presence of other types of material in addition to phytoplankton (i.e. bacteria, detritus, zooplankton). The existence of a relationship between the PON to chl-*a* ratio and the  $\delta^{15}\text{N}$  of suspended particles is an indicator of such a trophic effect (Waser *et al.*, 2000). The Pearson product-moment correlation coefficient of PON : chl-*a* and  $\delta^{15}\text{N}_{\text{sp}}$  was calculated to test this possibility.

The weighted mean of  $\delta^{15}\text{N}$  of suspended particles in the euphotic layer was used as an integral of the signature of phytoplankton in the euphotic zone to simplify the comparison with the  $\delta^{15}\text{N}$  of the two size-fractions of zooplankton (40–200 and  $>200 \mu\text{m}$ ). It was calculated, following Landrum *et al.* (Landrum *et al.*, 2011), as:

$$\text{Weighted mean } \delta^{15}\text{N}_{\text{sp}} = \frac{\sum_i ([\text{PN}]_i \times \Delta z_i \times \delta^{15}\text{N}_{\text{sp}})}{\sum_i ([\text{PN}]_i \times \Delta z_i)}$$

where  $[\text{PN}]_i$  is the concentration ( $\mu\text{M}$ ) of particulate nitrogen,  $\delta^{15}\text{N}_{\text{sp}}$  is the nitrogen isotopic composition of suspended particles ( $^{15}\text{N} : ^{14}\text{N}$ , ‰) and  $\Delta z_i$  is the depth interval (m).

The fraction contribution of diazotroph nitrogen to the bulk suspended particles defined by Montoya *et al.* (Montoya *et al.*, 2002) was also calculated as:

$$\% \text{ diazotroph N} = 100 \times \left( \frac{\delta^{15}\text{N}_{\text{sp}} - \delta^{15}\text{NO}_3^-}{\delta^{15}\text{N}_{\text{diazotroph}} - \delta^{15}\text{NO}_3^-} \right)$$

where  $\delta^{15}\text{N}_{\text{diazotroph}}$  is the nitrogen isotopic composition of diazotrophs ( $^{15}\text{N} : ^{14}\text{N}$ , ‰) and  $\delta^{15}\text{NO}_3^-$  is the nitrogen

isotopic composition of deep-nitrate ( $^{15}\text{N} : ^{14}\text{N}$ , ‰). As indicated by these authors, this two-end-member mixing model is sensitive to the values of the end-members chosen ( $\delta^{15}\text{N}_{\text{diazotroph}}$  and  $\delta^{15}\text{N}_{\text{NO}_3^-}$ ). In order to represent only the nitrate in the upper thermocline, and avoid the effect of recently fixed nitrogen recycled between the upper water column and the thermocline in the calculations, the  $\delta^{15}\text{N}_{\text{NO}_3^-}$  used was 4.5‰, which is the global average of deep-nitrate (Liu and Kaplan, 1989; Sigman *et al.*, 1997). Due to the fact that most of our stations were oligotrophic, no additional fractionation factor during nitrate uptake was added. As a conservative choice representing the least contribution of nitrogen fixers, and considering the fact that little fractionation occurs during  $\text{N}_2$  fixation (Montoya, 2007), the  $\delta^{15}\text{N}_{\text{diazotroph}}$  used was  $-2\text{‰}$  (Montoya *et al.*, 2002).

### Natural abundance of nitrogen isotopes in plankton

At each pre-dawn station, zooplankton were collected by vertical tows of a 40- $\mu\text{m}$  net, 30 cm in diameter, through the upper 200 m of the water column at a constant towing speed of 60  $\text{m min}^{-1}$ . The content of the collector was suspended in 500 mL of 20- $\mu\text{m}$  filtered seawater. Two 60 mL sub-samples were preserved, one in Lugol's solution and the other in formaldehyde, for the determination of the abundance of *Trichodesmium* and other plankton by microscopic examination. *Trichodesmium* trichomes were more abundant in the fraction of 40–200  $\mu\text{m}$  while colonies were present in the  $>200 \mu\text{m}$  fraction. The rest of the sample was separated into two size-fractions by passage through nylon sieves of 40 and 200  $\mu\text{m}$ . Each fraction was then re-suspended in 200 mL of 20- $\mu\text{m}$  filtered seawater and subsequently filtered on pre-weighted 45-mm diameter GF/F filters by low vacuum pressure. All filters were dried for 24 h at  $40^\circ\text{C}$  and stored until measurement of PON and  $^{15}\text{N}$  atom‰ as previously described.

The relative contribution of diazotroph N to zooplankton biomass was estimated following the Montoya *et al.* (Montoya *et al.*, 2002) two-end-member mixing model for zooplankton:

$$\% \text{ diazotroph N} = 100$$

$$\times \left( \frac{\delta^{15}\text{N}_{\text{plankton}} - \delta^{15}\text{N}_{\text{referencepl}}}{\delta^{15}\text{N}_{\text{diazotroph}} - \delta^{15}\text{N}_{\text{referencepl}}} \right)$$

where  $\delta^{15}\text{N}_{\text{plankton}}$  stands for the nitrogen isotopic composition of the plankton size-fraction ( $^{15}\text{N} : ^{14}\text{N}$ , ‰), and  $\delta^{15}\text{N}_{\text{reference pl}}$  is the  $\delta^{15}\text{N}$  of reference zooplankton. Again, a conservative value of  $-2\text{‰}$  was used for

$\delta^{15}\text{N}_{\text{diazotroph}}$ . The  $\delta^{15}\text{N}$  of the reference plankton was calculated as the mean of the  $\delta^{15}\text{N}_{40}$  or  $\delta^{15}\text{N}_{200}$  measured in the stations where the lowest abundance of *Trichodesmium* and nitrogen fixation was found, i.e. the stations between  $0^\circ\text{S}$  and  $20^\circ\text{S}$  on the latitudinal leg of 2007 cruise, where no influence of nitrogen fixation in the samples is expected. The values used were: 4.6‰ for the  $\delta^{15}\text{N}_{\text{reference 40}}$  and 5.9‰ for  $\delta^{15}\text{N}_{\text{reference 200}}$ . This model is based on the use of reference plankton to account for the trophic effect, i.e. the reference plankton serves as a proxy in both terms of the calculation; therefore, no additional fractionation term for the trophic effect was needed. The assumptions that are implied are: (i) the size distribution of grazers in the sample and the reference plankton are similar, (ii) the trophic fractionation in the sample and the reference are similar and (iii) in both locations the isotopic composition of the nitrate supporting the food web is the same (J. P. Montoya, personal communication).

## RESULTS

### Hydrography and fluorescence

In the latitudinal transects, the equatorial upwelling was clearly defined by the uplift of the isolines of temperature (T) and salinity (S) on both cruises (Fig. 2a–d). In order to simplify the data analysis, we use the changes in the depth of the  $16^\circ\text{C}$  isotherm, above and below 150 m, to identify the area affected by the equatorial upwelling and delimit three main regions along the transects, i.e. North gyre ( $29^\circ\text{N}$ – $15^\circ\text{N}$ ), equatorial region ( $15^\circ\text{N}$ – $10^\circ\text{S}$ ) and South gyre ( $10^\circ\text{S}$ – $33^\circ\text{S}$ ).

The hydrographic settings found in these regions were similar on both legs. Surface waters in the equatorial region were always warmer ( $>24^\circ\text{C}$ ) and less saline ( $<35$  psu) than in the gyres in both seasons. In turn, the stability of the water column in the gyres was weaker than that found in the equatorial region, where the average Brunt–Väisälä frequency in the upper 125 m was higher (Fernández *et al.*, 2010). The fluorescence profiles showed a well-defined DCM associated with the thermocline on both transects (Fig. 2e and f). This DCM was shallower and better defined in the equatorial region than in the gyres. In contrast, on the longitudinal sections, waters were warmer and slightly more saline in autumn 2007 than in spring 2008 (Fig. 2e), leading to a stronger stability of the water column, as indicated by the higher Brunt–Väisälä frequency measured on this cruise (Fernández *et al.*, 2013). The DCM was located at  $\sim 100$  m on both zonal legs, and no apparent trend in depth was observed (Fig. 2e and f).



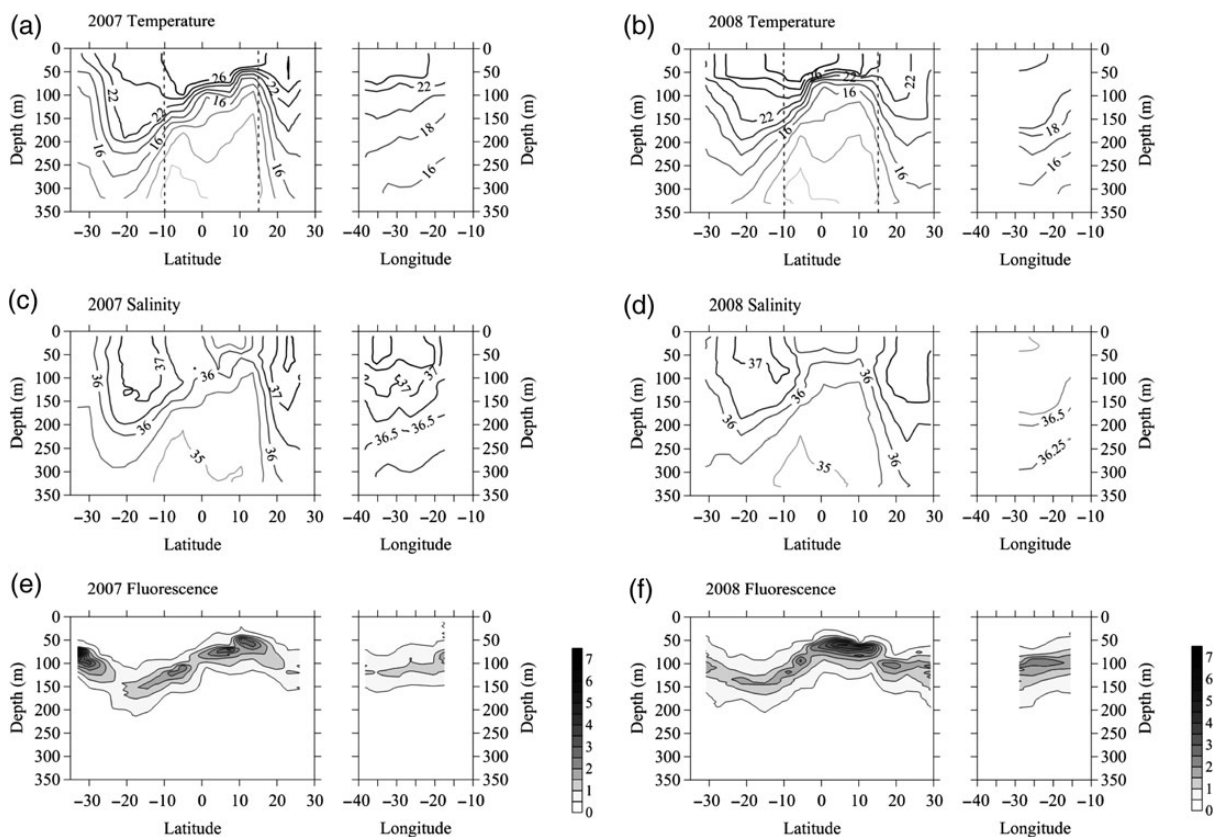

**Fig. 2.** Zonal and meridional vertical distribution of temperature ( $^{\circ}\text{C}$ ), salinity and fluorescence in autumn 2007 and spring 2008 cruises. Dashed lines in the temperature panels define the limits of the three major regions identified by the depth of  $16^{\circ}\text{C}$  isotherm: North gyre, equatorial region and South gyre.

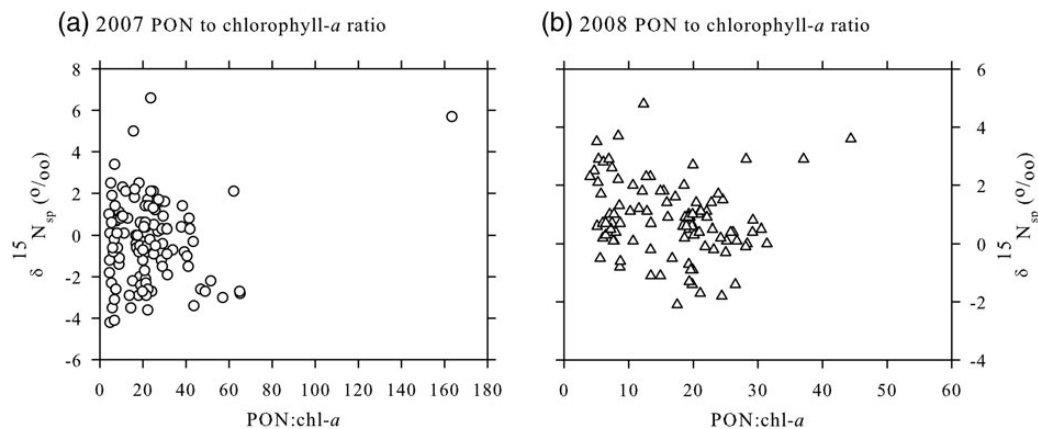

**Fig. 3.** Relationship between the  $\delta^{15}\text{N}$  of suspended particles ( $\delta^{15}\text{N}_{\text{sp}}$ ) and the PON to chl-*a* ratio during the autumn 2007 (a) and the spring 2008 (b) cruises.

### Stable nitrogen isotopes in suspended particles ( $\delta^{15}\text{N}_{\text{sp}}$ ) and PON

The Pearson product-moment correlation coefficient of PON:chl-*a* and  $\delta^{15}\text{N}_{\text{sp}}$  showed no significant relationship, neither positive nor negative, on our two cruises

(Fig. 3). The PON:chl-*a* ratio represents the contribution of other components of the food web other than phytoplankton. If any relationship between PON:chl-*a* ratio and  $\delta^{15}\text{N}_{\text{sp}}$  is found, this would suggest a significant effect of detrital matter and/or other non-phytoplankton

organisms on the observed signal of suspended particles. Thus, we can assume that the  $\delta^{15}\text{N}$  of suspended particles in our data mainly reflects the composition of phytoplankton (Waser *et al.*, 2000).

The zonal distribution of PON showed that no apparent trend and the measured concentrations were similar in magnitude on both cruises (Fig. 4b and d), without any significant differences between cruises (*t*-test,  $n = 60$ ). The mean PON concentrations for the zonal transects were  $0.22 \pm 0.12 \mu\text{M}$  in 2007 and  $0.24 \pm 0.06 \mu\text{M}$  in 2008. In the latitudinal sections, the measured concentrations in the South gyre were similar on both cruises, showing similar values and vertical variability (Fig. 4a and c). In the North gyre and equatorial regions, measured PON differed significantly between cruises (*t*-test,  $P < 0.01$ ,  $n = 54$  and  $P < 0.05$ ,  $n = 84$ , respectively). In the North gyre region, the concentrations of PON on the 2007 cruise were higher than that on the 2008 cruise. In the equatorial region, PON showed a decreasing pattern on the 2007 cruise but no linear trend was observed in 2008.

In the zonal transect of the 2007 cruise, the  $\delta^{15}\text{N}_{\text{sp}}$  increased sharply by 4–6‰ from 80 to 100 m to the base of the euphotic layer, probably reflecting the influence of the African upwelling in the easternmost stations (Fig. 5a). However, the  $\delta^{15}\text{N}_{\text{sp}}$  distributed uniformly in the euphotic layer on the 2008 cruise (Fig. 5b). On the latitudinal transects, the  $\delta^{15}\text{N}_{\text{sp}}$  was lower in 2007 than in 2008, both in the North gyre (Fig. 5c and d) and equatorial region (Fig. 5e and f). In contrast, in the South gyre region, the vertical distribution of  $\delta^{15}\text{N}_{\text{sp}}$  differed between stations on each cruise (Fig. 5g and h), with a wide range of values between  $-4$  and  $4$ ‰. The differences between cruises were significant on the zonal transect, in the North gyre and the equatorial region (*t*-test,  $P < 0.01$ ,  $n = 72$ ), but not in the South gyre region.

The correlations of  $\delta^{15}\text{N}$  of suspended particles with ammonium concentration and with nitrate concentration are shown in Table I. Considering all the stations on each cruise,  $\delta^{15}\text{N}_{\text{sp}}$  correlated with ammonium concentration in 2007 ( $P < 0.05$ ,  $n = 128$ ) and with nitrate in 2008 ( $P < 0.05$ ,  $n = 119$ ).

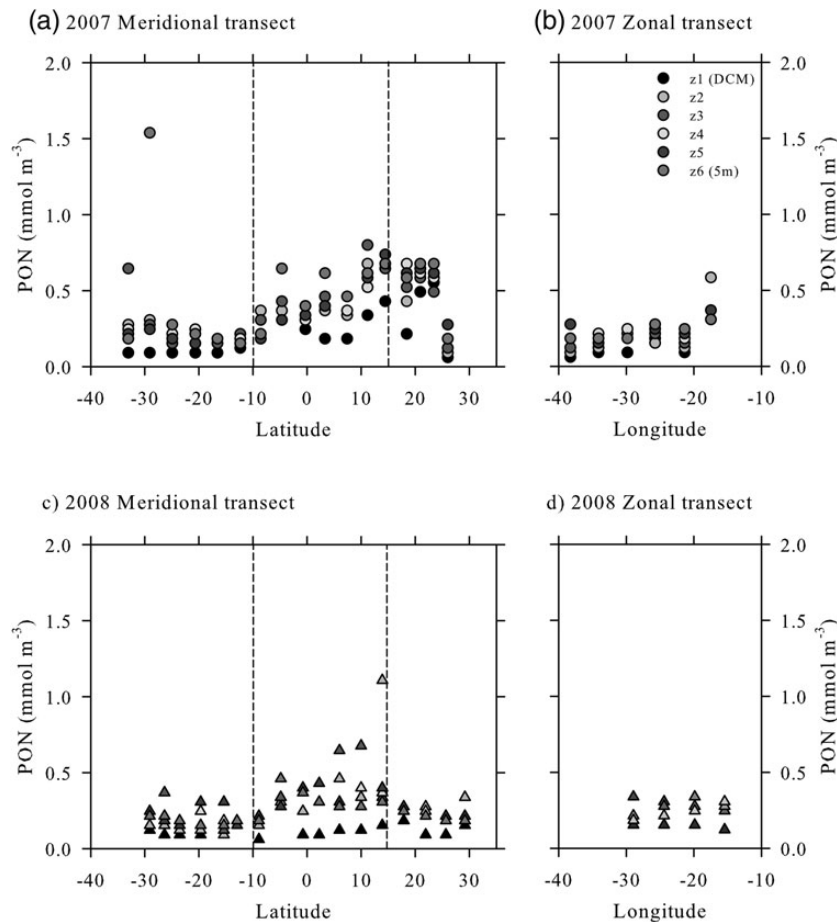

**Fig. 4.** Zonal and meridional distributions of PON of suspended particles (PON) during the autumn 2007 (a and b) and spring 2008 (c and d) cruises. Dashed lines define the limits of the three major regions identified by the depth of  $16^{\circ}\text{C}$  isotherm in the meridional transect: North gyre, equatorial region and South gyre. In the legend, z1 to z6 represent the sampled depths from deeper depth, z1 (DCM), to shallower depth, z6 (5 m).

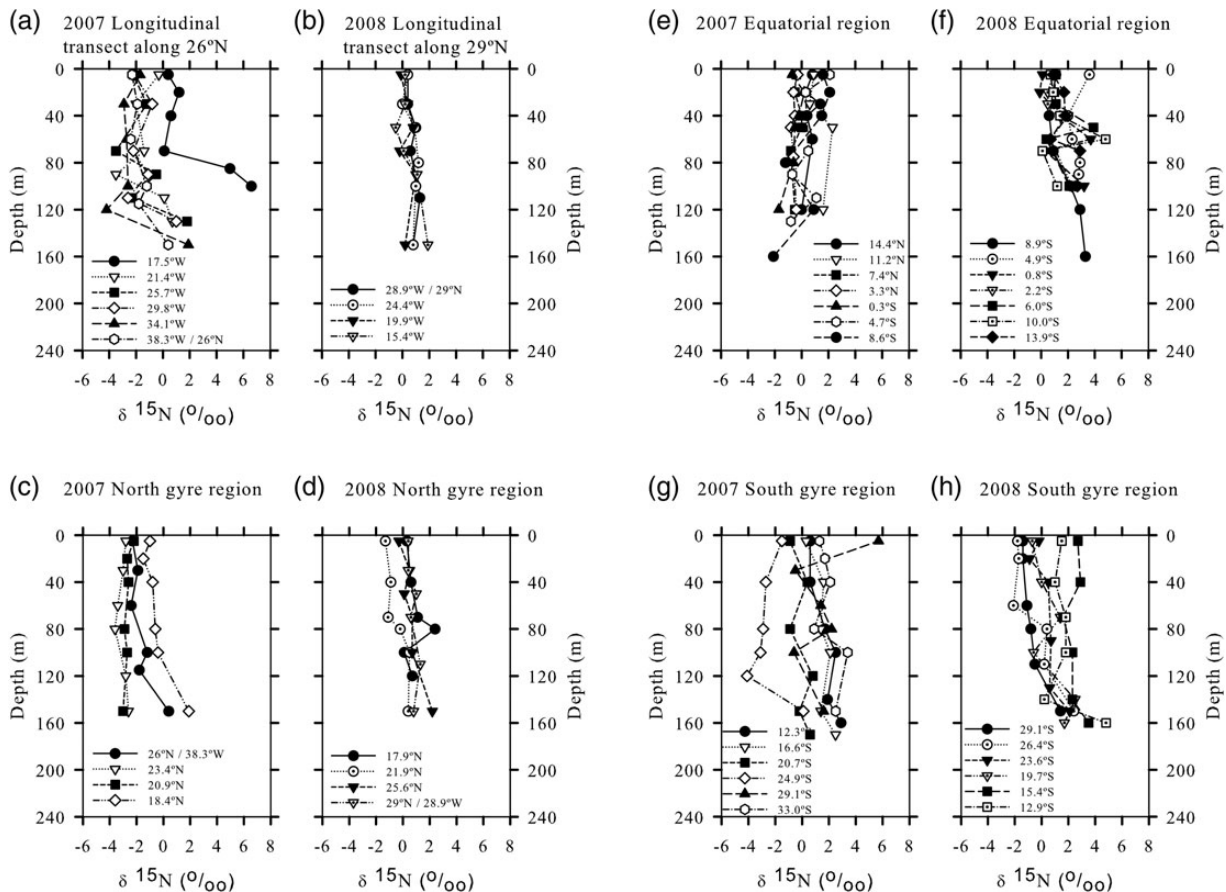

**Fig. 5.** Vertical distribution of  $\delta^{15}\text{N}$  of suspended particles ( $\delta^{15}\text{N}_{\text{sp}}$ ) in autumn 2007 and spring 2008 cruises grouped by region: (a and b) zonal transect ( $15^{\circ}\text{W}$ – $38^{\circ}\text{W}$ ), (c and d) North gyre region ( $30^{\circ}\text{N}$ – $15^{\circ}\text{N}$ ), (e and f) equatorial region ( $15^{\circ}\text{N}$ – $10^{\circ}\text{S}$ ) and (g and h) South gyre region ( $10^{\circ}\text{S}$ – $30^{\circ}\text{S}$ ).

*Table I: Pearson product-moment correlation coefficient between  $\delta^{15}\text{N}$  of suspended particles ( $\delta^{15}\text{N}_{\text{sp}}$ ) and nutrient concentration: ammonium ( $\text{NH}_4$ ) and nitrate ( $\text{NO}_3$ ), in 2007 and 2008 cruises*

|               | 2007 cruise    |                         |                   |            | 2008 cruise    |                         |                   |                |
|---------------|----------------|-------------------------|-------------------|------------|----------------|-------------------------|-------------------|----------------|
|               | All stations   | North gyre <sup>a</sup> | Equatorial region | South gyre | All stations   | North gyre <sup>a</sup> | Equatorial region | South gyre     |
| $\text{NH}_4$ | 0.22*<br>[128] | 0.55*<br>[54]           | 0.43**<br>[38]    | n.s.       | n.s.           | n.s.                    | 0.47**<br>[42]    | −0.38*<br>[36] |
| $\text{NO}_3$ | n.s.           | 0.30*<br>[54]           | n.s.              | n.s.       | 0.21*<br>[120] | n.s.                    | n.s.              | 0.51**<br>[36] |

Numbers in brackets represent the total number of samples used for the analysis.

n.s., no significance.

<sup>a</sup>Includes the zonal and meridional legs in the North gyre.

\* $P < 0.05$ , \*\* $P < 0.01$ .

### Nitrogen isotopic signature in the euphotic layer

In order to compare the  $\delta^{15}\text{N}$  of suspended particles and plankton net tows, we calculated the weighted mean of  $\delta^{15}\text{N}$  of suspended particles to obtain an integrative  $\delta^{15}\text{N}_{\text{sp}}$  signature for the whole euphotic layer. The patterns described by the  $\delta^{15}\text{N}$  of the planktonic 40–

200  $\mu\text{m}$  ( $\delta^{15}\text{N}_{40}$ ) and  $>200 \mu\text{m}$  ( $\delta^{15}\text{N}_{200}$ ) size-fractions were very similar at all stations, with a few exceptions in the equatorial region and the zonal legs, and closely matched that of  $\delta^{15}\text{N}_{\text{sp}}$  (Fig. 6). The average differences between  $\delta^{15}\text{N}_{\text{sp}}$  and the two plankton size-fractions were in the range previously described (Minagawa and Wada, 1984): between the  $\delta^{15}\text{N}_{\text{sp}}$  and the  $\delta^{15}\text{N}_{40}$  that difference was 3.2‰

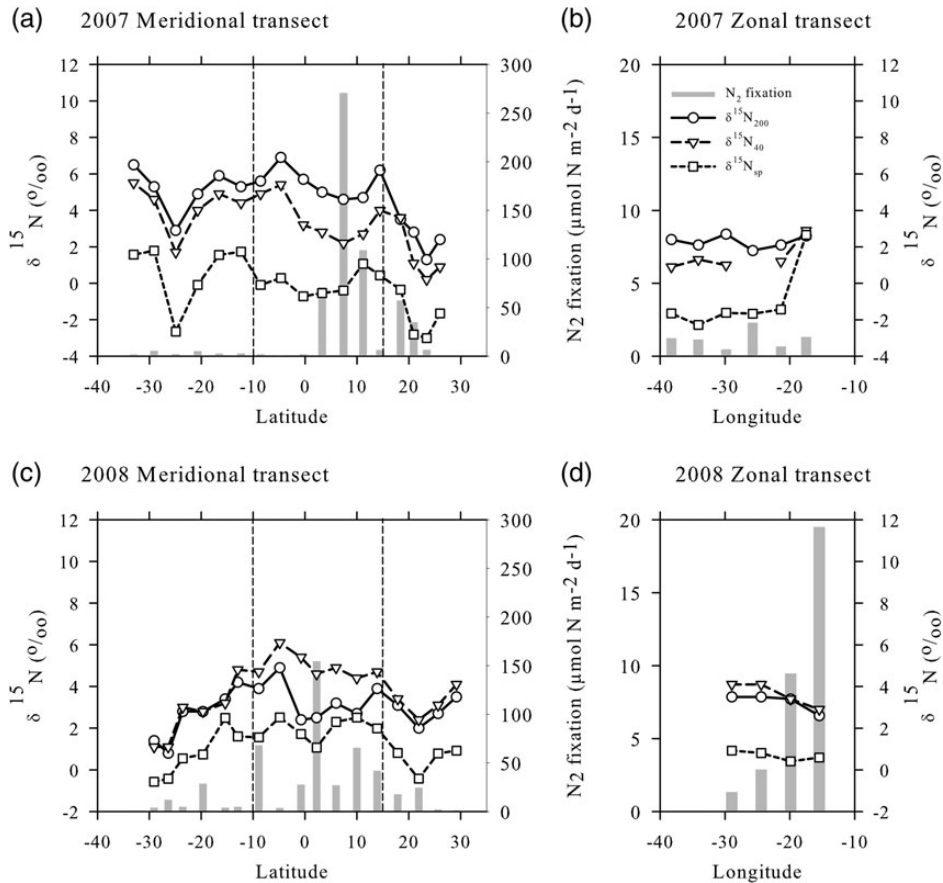

**Fig. 6.** Zonal and meridional distributions of the weighted mean of  $\delta^{15}\text{N}$  of suspended particles ( $\delta^{15}\text{N}_{\text{sp}}$ ), the  $\delta^{15}\text{N}$  of 40–200  $\mu\text{m}$  plankton size-fraction ( $\delta^{15}\text{N}_{40}$ ), the  $\delta^{15}\text{N}$  of >200  $\mu\text{m}$  plankton size-fraction ( $\delta^{15}\text{N}_{200}$ ), and concurrent measured  $\text{N}_2$  fixation (Fernández *et al.*, 2010, 2013) in autumn 2007 (**a** and **b**) and spring 2008 (**c** and **d**). Dashed lines define the limits of the three major regions identified by the depth of 16°C isotherm in the meridional transect: North gyre, equatorial region and South gyre.

in 2007 and 2.6‰ in 2008 and between the  $\delta^{15}\text{N}_{\text{sp}}$  and the  $\delta^{15}\text{N}_{200}$  was 4.3‰ in 2007 and 1.9‰ in 2008.

In the autumn 2007 meridional transect, the isotopic signature of suspended particles showed two minima ( $< -2\text{‰}$ ) in the North gyre and South gyre regions. In the equatorial region,  $\delta^{15}\text{N}_{\text{sp}}$  oscillated  $\sim 0\text{‰}$  (Fig. 6). The  $\delta^{15}\text{N}_{40}$  and  $\delta^{15}\text{N}_{200}$  roughly followed these patterns. In contrast, the distributions were dome shaped in spring 2008, reaching peak values in the equatorial region. On both cruises, the gyres showed low  $\delta^{15}\text{N}$  values at most of the stations. Besides, a positive statistical correlation between  $\delta^{15}\text{N}$  in the three fractions suggests a regular impact of light nitrogen across trophic levels (Table II).

A two-way factorial ANOVA indicated significant differences between regions and cruises, and for the comparison of  $\delta^{15}\text{N}_{40}$  and  $\delta^{15}\text{N}_{200}$ , the interaction region-cruise was also significant, and enhanced the observed difference (Table III). The differences between regions appeared to be significant only for the North gyre-equatorial region (*post hoc* Tukey's HSD test) as can be also seen in Fig. 6.

*Table II: Pearson product-moment correlation coefficient between  $\delta^{15}\text{N}$  of suspended particles ( $\delta^{15}\text{N}_{\text{sp}}$ ),  $\delta^{15}\text{N}$  of 40–200  $\mu\text{m}$  plankton size-fraction ( $\delta^{15}\text{N}_{40}$ ) and  $\delta^{15}\text{N}$  of >200  $\mu\text{m}$  plankton size-fraction ( $\delta^{15}\text{N}_{200}$ ) in the latitudinal transects of 2007 and 2008 cruises*

|                             | $\delta^{15}\text{N}_{\text{sp}}$ |        | $\delta^{15}\text{N}_{40}$ |        |
|-----------------------------|-----------------------------------|--------|----------------------------|--------|
|                             | 2007                              | 2008   | 2007                       | 2008   |
| $\delta^{15}\text{N}_{40}$  | 0.66**                            | 0.82** | –                          | –      |
| $\delta^{15}\text{N}_{200}$ | 0.66**                            | 0.74** | 0.90**                     | 0.78** |

\*\* $P < 0.01$ ,  $n = 17$ .

We tried to estimate if *Trichodesmium* could be the major influence on the patterns observed but no significant correlation (Pearson's  $r$ ) was found between the measured filament abundance (Fernández *et al.*, 2010, 2013) and the  $\delta^{15}\text{N}$  of suspended particles ( $P = \text{n.s.}$ ,  $n = 42$ ), the



**Table III:** Two-way factorial ANOVA (region, cruise) of  $\delta^{15}\text{N}$  of suspended particles ( $\delta^{15}\text{N}_{\text{sp}}$ ),  $\delta^{15}\text{N}$  of 40–200  $\mu\text{m}$  plankton size-fraction ( $\delta^{15}\text{N}_{40}$ ) and  $\delta^{15}\text{N}$  of >200  $\mu\text{m}$  plankton size-fraction ( $\delta^{15}\text{N}_{200}$ ) in the 2007 and 2008 cruises

|                   | DF | $\delta^{15}\text{N}_{\text{sp}}$ |      |     |       | $\delta^{15}\text{N}_{40}$ |      |      |       | $\delta^{15}\text{N}_{200}$ |      |      |       |
|-------------------|----|-----------------------------------|------|-----|-------|----------------------------|------|------|-------|-----------------------------|------|------|-------|
|                   |    | SS                                | MS   | F   | P     | SS                         | MS   | F    | P     | SS                          | MS   | F    | P     |
| Region            | 2  | 23.6                              | 11.8 | 6.3 | 0.004 | 26.6                       | 13.3 | 11.5 | 0.000 | 25.7                        | 12.8 | 15.4 | 0.000 |
| Cruise            | 1  | 16.0                              | 16.0 | 8.6 | 0.006 | 4.8                        | 4.8  | 4.2  | 0.048 | 15.9                        | 15.9 | 19.2 | 0.000 |
| Region vs. cruise | 2  | 6.0                               | 3.0  | 1.6 | 0.213 | 20.9                       | 10.5 | 9.0  | 0.000 | 21.7                        | 10.9 | 13.1 | 0.000 |

DF, degrees of freedom; SS, sums of squares; MS, mean of squares; F, F statistic; P, probability.

**Table IV:** Mean  $\pm$  standard deviation of the contribution of diazotroph nitrogen to  $\delta^{15}\text{N}$  of suspended particles, 40–200  $\mu\text{m}$  plankton size-fraction ( $\delta^{15}\text{N}_{40}$ ) and >200  $\mu\text{m}$  plankton size-fraction ( $\delta^{15}\text{N}_{200}$ ) according to the two-end-member mixing model proposed by Montoya et al. (Montoya et al., 2002)

| Region                | Suspended particles |         | 40–200 $\mu\text{m}$ zooplankton |         | >200 $\mu\text{m}$ zooplankton |         |
|-----------------------|---------------------|---------|----------------------------------|---------|--------------------------------|---------|
|                       | 2007                | 2008    | 2007                             | 2008    | 2007                           | 2008    |
| Longitudinal transect | 81 (29)             | 59 (3)  | 52 (14)                          | 16 (9)  | 43 (4)                         | 31 (6)  |
| North gyre region     | 85 (14)             | 61 (10) | 48 (22)                          | 21 (11) | 41 (12)                        | 36 (8)  |
| Equatorial region     | 62 (27)             | 39 (8)  | 25 (18)                          | 3 (2)   | 11 (3)                         | 29 (12) |
| South gyre region     | 49 (12)             | 58 (18) | 15 (20)                          | 36 (16) | 13 (15)                        | 40 (17) |

The reference zooplankton used in each fraction corresponded to the average of the stations sampled in the South gyre during 2007 where *Trichodesmium* abundance was  $<1$  trichome  $\text{L}^{-1}$ ,  $\delta^{15}\text{N}_{40} = 4.6\text{‰}$  and  $\delta^{15}\text{N}_{200} = 5.9\text{‰}$ . The values of % of diazotroph N  $>100$  and  $<0$  were discarded in the calculation of the regions average. Number of samples is indicated in parentheses.

40–200  $\mu\text{m}$  ( $P = \text{n.s.}$ ,  $n = 41$ ) or the >200  $\mu\text{m}$  plankton size-fractions ( $P = \text{n.s.}$ ,  $n = 42$ ).

Nitrogen fixation rates (Fig. 6) were previously reported in Fernández *et al.* (Fernández *et al.*, 2010, 2013). Briefly, on the longitudinal transects, no apparent trend was observed in 2007 while a clear increasing pattern to the East appeared in 2008 (Fig. 6b and d). On the spring 2008 zonal leg, the average vertically integrated  $\text{N}_2$  fixation was 7-fold higher than that in autumn 2007 ( $8.3 \pm 3.3$  vs  $1.2 \pm 0.5$   $\mu\text{mol N m}^{-2} \text{day}^{-1}$ ). On both meridional transects, the highest integrated rates ( $\sim 250$  and  $150$   $\mu\text{mol N m}^{-2} \text{day}^{-1}$  in 2007 and 2008, respectively) were measured at stations located within the equatorial region (Fig. 6a and c). Besides, the North gyre showed higher diazotrophic activities than the South gyre. However, while  $\text{N}_2$  fixation south of the Equator was almost undetectable during the 2007 cruise, substantial rates were measured in the Southern Hemisphere in 2008 (Fig. 6a and c).

### Diazotroph nitrogen contribution to $\delta^{15}\text{N}$ in the euphotic layer

The contribution of diazotrophs to the observed  $\delta^{15}\text{N}$  of suspended particles, 40–200  $\mu\text{m}$  and >200  $\mu\text{m}$  plankton size-fractions, estimated by the two-end-member mixing models, decreased to the South on the 2007 cruise

(Table IV). In 2008, the minimum was observed in the equatorial region (Table IV). The importance of this contribution is higher in 2007, except in the South gyre, where the contribution of diazotroph nitrogen was higher in all size-fractions. On both cruises, diazotrophy explains, on average, 61% of the observed  $\delta^{15}\text{N}_{\text{sp}}$ , 27% of  $\delta^{15}\text{N}_{40}$  and 30% of  $\delta^{15}\text{N}_{200}$ .

## DISCUSSION

Our data contribute to the existing studies in the Atlantic Ocean (Waser *et al.*, 2000; Mino *et al.*, 2002; Montoya *et al.*, 2002; Mahaffey *et al.*, 2003, 2004; Reynolds *et al.*, 2007; Landrum *et al.*, 2011; Mompeán *et al.*, 2013) providing basin-scale distribution of  $\delta^{15}\text{N}$  in suspended particles and two plankton size-fractions during two contrasting seasons. We found a consistent  $^{15}\text{N}$ -depleted signal ( $<4\text{‰}$ ) in suspended particles ( $\delta^{15}\text{N}_{\text{sp}}$ ) in the euphotic layer at most of the stations (Figs 5 and 6). This implies that nitrogen fixation and/or atmospheric deposition were supplying an important fraction of new nitrogen in most of the tropical and subtropical Atlantic Ocean during our cruises. The trends in the  $\delta^{15}\text{N}$  of the two plankton size-fractions closely matched that of suspended particles, indicating an impact of light nitrogen

even in upper trophic levels, at least for some regions (Fig. 6, Table II).

On the meridional transect in 2008, the  $\delta^{15}\text{N}$  signal in the  $>200\ \mu\text{m}$  size-fraction ( $\delta^{15}\text{N}_{200}$ ) was lower than that in the  $40\text{--}200\ \mu\text{m}$  size-fraction ( $\delta^{15}\text{N}_{40}$ ) at most of the stations (Fig. 6), contrary to the usually observed enrichment in  $^{15}\text{N}$  of upper trophic levels (Montoya, 2008). One possible reason is that the longer turnover times of mesozooplankton relative to phytoplankton and microplankton could result in the uncoupling of different size-fractions, producing this inversion of the expected increasing pattern (Landrum *et al.*, 2011; Mompeán *et al.*, 2013). Another possible explanation could be the presence of *Trichodesmium* colonies, which were large enough to be retained in this size-fraction, and would have lowered the isotopic signature of zooplankton.

### Zonal and meridional variations in $\delta^{15}\text{N}$ in the North gyre

In the North gyre, the difference in  $\delta^{15}\text{N}_{\text{sp}}$  between stations was higher in autumn 2007 than in spring 2008 (6 and 2‰, respectively). However, the vertical change in  $\delta^{15}\text{N}_{\text{sp}}$  at each station was small on both cruises (Fig. 5) and the measured values of  $\delta^{15}\text{N}_{\text{sp}}$  were always  $<2\%$ . Our data agree with previous reports in the subtropical North Atlantic, which show a range of variation between  $-2$  and  $4\%$  in the signature of suspended particles (Montoya *et al.*, 2002; Mahaffey *et al.*, 2003; Reynolds *et al.*, 2007; Landrum *et al.*, 2011). These authors described a consistently depleted signal between  $7^\circ\text{N}$  and  $32^\circ\text{N}$ , which is also confirmed by geochemical tracers (Gruber and Sarmiento, 1997; Hansell *et al.*, 2004) that point to a persistent excess nitrate relative to phosphate in this area, indicative of intense nitrogen fixation. Those light nitrogen signatures have been associated with a large impact of diazotrophic nitrogen in the isotopic budget of this area, discarding the influence of other sources of new light nitrogen because of their weak strength or unlikely occurrence (Reynolds *et al.*, 2007; Landrum *et al.*, 2011). However, later studies provided new insights that suggest a more important influence of alternative sources such as the atmospheric deposition of  $^{15}\text{N}$ -depleted nitrogen (Baker *et al.*, 2007; Hastings *et al.*, 2009; Mara *et al.*, 2009; Morin *et al.*, 2009; Knapp *et al.*, 2010; Holtgrieve *et al.*, 2011; Mouriño-Carballido *et al.*, 2011).

The  $\delta^{15}\text{N}$  of deep-water nitrate typically ranges between 3 and 6‰ with a global average of 4.8‰ (Montoya, 2008). In the presence of excess nitrate, the isotopic fractionation, due to the incomplete exhaustion of the nitrate pool by phytoplankton, could result in values of  $\delta^{15}\text{N}_{\text{sp}} < 3\%$  (Montoya, 2008). A recent study showed that cyanobacteria, especially *Trichodesmium*,

growing on nitrate could express a nitrogen isotopic signal similar to that of nitrogen fixation depending on the isotopic composition of the nitrogen source, the degree of fractionation and the species of cyanobacterium (Bauersachs *et al.*, 2009). However, no excess dissolved inorganic nitrogen was found in surface waters in our zonal or meridional legs, where the concentration of nitrate in the euphotic layer was always  $<130\ \text{nM}$  (Mouriño-Carballido *et al.*, 2011; Fernández *et al.*, 2010, 2013). We also recorded measurable but low abundances of *Trichodesmium* ( $<60$  trichomes  $\text{L}^{-1}$ ) in the euphotic layer (Fernández *et al.*, 2010, 2013), which is also an indication of potential diazotrophy in the area. But, no significant correlation appeared between *Trichodesmium* abundances and the  $\delta^{15}\text{N}_{\text{sp}}$  (Pearson's  $r$ ). Hence, we would not expect that a strong isotopic fractionation associated with cyanobacteria or other phytoplankters was responsible for the observed  $\delta^{15}\text{N}_{\text{sp}}$  during our cruises.

The lack of data on atmospheric deposition of nitrogen during our study limits any direct comparison with the measured nitrogen fixation and the distribution of the  $\delta^{15}\text{N}$  signature, but we can attempt to use an indirect analysis instead. The two-end-member model proposed by Montoya *et al.* (Montoya *et al.*, 2002) yields a contribution of  $\text{N}_2$  fixation to  $\delta^{15}\text{N}_{\text{sp}}$  in the range of 81–85% in 2007 and 59–61% in 2008 (Table IV), which is close to the previous estimation of 74% by Reynolds *et al.* (Reynolds *et al.*, 2007). However, experimental measurements of community nitrogen fixation in this region indicate modest rates of diazotrophy ( $<60\ \mu\text{mol N m}^{-2}\ \text{day}^{-1}$ ) throughout the year (Fig. 6; Moore *et al.*, 2009; Benavides *et al.*, 2011). During the spring 2008 cruise, Mouriño-Carballido *et al.* (Mouriño-Carballido *et al.*, 2011) calculated the relative importance of nitrate eddy diffusion and measured rates of nitrogen fixation as sources of new nitrogen to the euphotic layer in the North gyre. They estimated that the average contribution of nitrogen fixation during this cruise was only 2% over daily timescales. We acknowledge that the comparison of these two fluxes is difficult as they represent different timescales, i.e. the  $\delta^{15}\text{N}_{\text{sp}}$  represents timescales of days to weeks, while the measured nitrogen fixation timescale is 1 day. But the difference between the fluxes was 30-fold in 2008. This suggests that other sources than diazotrophy may be contributing to our observed  $\delta^{15}\text{N}_{\text{sp}}$ , and that the low values are not only a consequence of intense nitrogen fixation. The importance of the atmospheric deposition of low  $\delta^{15}\text{N}$  nitrogen, natural or anthropogenic, is increasing in high and temperate latitudes (Hastings *et al.*, 2009; Mara *et al.*, 2009; Morin *et al.*, 2009; Holtgrieve *et al.*, 2011). According to the model of Duce *et al.* (Duce *et al.*, 2008), the atmospheric supply of anthropogenic reactive nitrogen in the central North Atlantic is usually higher in the latitudinal range between  $5^\circ\text{N}$  and  $25^\circ\text{N}$ . The  $\delta^{15}\text{N}$  of this

anthropogenic N depends on its origin and is extremely variable (Fang *et al.*, 2011). For instance the  $\delta^{15}\text{N}$  of fuel  $\text{NO}_x$  produced by power plants ranges between 5 and 13‰ (Heaton, 1990; Kiga *et al.*, 2000) but that of thermal  $\text{NO}_x$  produced by vehicle exhausts ranges between  $-13$  and  $-2$ ‰ (Heaton, 1990). Additionally, in the Atlantic Ocean between  $45^\circ\text{N}$  and  $45^\circ\text{S}$ , Morin *et al.* (Morin *et al.*, 2009) found a  $\delta^{15}\text{N}$  of atmospheric nitrate that ranged between  $-7$  and  $-1.6$ ‰ and mainly representative of natural sources. In the Mediterranean Sea (Crete), Mara *et al.* (Mara *et al.*, 2009) described a consistent source of low  $\delta^{15}\text{N}$  nitrate throughout the year with a potential impact on the isotopic budget of intermediate and deep-waters, which could lead to an overestimation of  $\text{N}_2$  fixation if atmospheric nitrate is neglected. In spite of that, previous studies discarded the effect of this process in the analysis of the nitrogen isotopic budget, based on the assumption that the flux is small compared with nitrogen fixation (Landrum *et al.*, 2011) or to the export flux of nitrogen out of the euphotic layer (Reynolds *et al.*, 2007). In contrast, Baker *et al.* (Baker *et al.*, 2007) and Knapp *et al.* (Knapp *et al.*, 2010) measured atmospheric depositional fluxes of  $^{15}\text{N}$ -depleted nitrogen similar to those of  $\text{N}_2$  fixation in the North Atlantic Ocean. Considering this information, we suggest that the observed  $\delta^{15}\text{N}_{\text{sp}}$  in the North gyre region during our cruises could be the result of the supply of light nitrogen through both nitrogen fixation and atmospheric deposition. Therefore, discarding the effect of this atmospheric supply in the analysis of  $\delta^{15}\text{N}_{\text{sp}}$  would result in the overestimation of nitrogen fixation.

The signature of light nitrogen found in suspended matter spreads over the food web. First, the  $\delta^{15}\text{N}$  distributions of the two zooplankton size-fractions and the suspended particles are significantly correlated (Fig. 6, Table II). Secondly, the observed difference between plankton and particles at each station ( $2$ – $4$ ‰) agrees with previous studies reporting that zooplankton nitrogen is typically 3‰ heavier than phytoplankton (Minagawa and Wada, 1984) due to the enrichment of zooplankton tissues by the isotopic fractionation associated with metabolic and excretory processes (Montoya, 2008). Thirdly, both plankton size-fractions showed relatively low values of  $\delta^{15}\text{N}$  throughout the transects ( $<4$ ‰). Again, the data provided by the two-end-member model proposed by Montoya *et al.* (Montoya *et al.*, 2002) point out that the contribution of nitrogen fixation to upper trophic levels in 2007 represents 48–52% in the  $40$ – $200\ \mu\text{m}$  size-fraction and 41–43% in the  $>200\ \mu\text{m}$  size-fraction (Table IV). In 2008, it represented roughly 16–21% of the  $40$ – $200\ \mu\text{m}$  fraction signal and the 31–36% of the  $>200\ \mu\text{m}$  size-fraction (Table IV). However, we would expect an overestimation of this contribution due to the combined effect of atmospheric deposition of  $^{15}\text{N}$ -depleted

nitrogen and nitrogen fixation in the isotopic budget of this region.

The  $\delta^{15}\text{N}$  measured in suspended particles and zooplankton suggests a consistent supply of light nitrogen in this region of the Atlantic Ocean throughout the year, which coincides with previous studies (Montoya *et al.*, 2002; Mahaffey *et al.*, 2003; Reynolds *et al.*, 2007; Landrum *et al.*, 2011). However, we did not measure the isotopic composition of the depositional fluxes, which could be compared with measured community nitrogen fixation on our cruises to determine the actual contribution of each flux (Baker *et al.*, 2007; Knapp *et al.*, 2010). Further studies, characterizing the strength, frequency and  $\delta^{15}\text{N}$  of the atmospheric sources of nitrogen relative to *in situ* measured nitrogen fixation, will help to unequivocally ascertain the relative importance of each process in determining the  $\delta^{15}\text{N}$  signatures in the North Atlantic.

### Meridional variations in $\delta^{15}\text{N}$ in the equatorial region

In the equatorial region ( $15^\circ\text{N}$ – $10^\circ\text{S}$ ), the meridional trends of the  $\delta^{15}\text{N}$  of suspended particles coincided with those previously described by Mahaffey *et al.* (Mahaffey *et al.*, 2004). However, our absolute values are lower than theirs, in the range of  $-2$  to  $4$ ‰, and closer to those measured by Reynolds *et al.* (Reynolds *et al.*, 2007) in the water column and by Mino *et al.* (Mino *et al.*, 2002) in surface waters. The upwelling in this region allows a persistent diffusion of deep-nitrate to surface waters, which was reflected in the increase of nitrate concentration during our cruises (Fernández *et al.*, 2010, 2013; Mouriño-Carballido *et al.*, 2011), and is likely to support a substantial fraction of primary production. Therefore, heavy deep-nitrate is probably determining part of the  $\delta^{15}\text{N}$  of suspended particles in the equatorial region.

In autumn 2007, the difference between the  $\delta^{15}\text{N}$  of  $40$ – $200$  and  $>200\ \mu\text{m}$  plankton size-fractions (2‰) suggests either a different time scale in the integration of the signal or a low efficiency in the transfer of nitrogen to upper trophic levels. The latter could be attributed to the loss of isotopically light ammonium through excretory processes, which has been proposed as a major source of light nitrogen in oligotrophic regions (Checkley and Miller, 1989; Montoya, 2008). However, the positive correlation between  $\delta^{15}\text{N}$  of suspended particles and ammonium concentration on our cruises (Table I) suggests that the increase in ammonium is increasing the  $\delta^{15}\text{N}_{\text{sp}}$  and may not be related to the excretion of plankton.

The cyanobacterium *Trichodesmium* exudes up to 50% of recent fixed  $\text{N}_2$  as dissolved organic nitrogen, which can be easily assimilated by other phytoplankters and/or

bacteria (Glibert and Bronk, 1994). Furthermore, both nitrogen fixation (Fig. 6) and *Trichodesmium* abundances typically reach high values in this region (Tyrrell *et al.*, 2003; Moore *et al.*, 2009; Fernández *et al.*, 2010). Thus, the supply of light ammonium linked to diazotrophs is probably determining an important fraction of the nitrogen isotopic budget in the equatorial region. The two-end-member mixing model (Montoya *et al.*, 2002) yields an average contribution of this diazotroph nitrogen to  $\delta^{15}\text{N}_{\text{sp}}$  of  $62 \pm 27\%$  in autumn 2007 and  $39 \pm 8\%$  in spring 2008 (Table IV). On the other hand, Mouriño-Carballido *et al.* (Mouriño-Carballido *et al.*, 2011) estimated that the daily contribution of  $\text{N}_2$  fixation to total ( $\text{N}_2$  fixation + vertical diffusion of nitrate) input of new nitrogen was 22% on the 2008 cruise. Again, these fluxes represent different time scales, but both suggest that nitrogen fixation accounts for a relevant fraction of the supply of nitrogen to the euphotic layer in this region, and is consistent with previous experimental measurements.

The diazotroph nitrogen was inefficiently transferred to upper trophic levels as it accounted for  $25 \pm 18\%$  in the 40–200  $\mu\text{m}$  size-fraction and  $11 \pm 3\%$  in the >200  $\mu\text{m}$  size-fraction in 2007 cruise and for  $3 \pm 2\%$  in the 40–200  $\mu\text{m}$  size-fraction and  $29 \pm 12\%$  in the >200  $\mu\text{m}$  size-fraction in 2008 cruise (Table IV). *Trichodesmium*, the dominant diazotroph in this region, is toxic to many species of zooplankton (Hawser *et al.*, 1992) and only a few groups of copepods are known to graze it (O’Neil and Roman, 1994). Besides, these groups seem to excrete a major fraction of the ingested nitrogen (O’Neil *et al.*, 1996; Wannicke *et al.*, 2010). Thus, diazotroph nitrogen is preferentially transferred through dissolved pools when *Trichodesmium* dominates the community (Mulholland, 2007).

### Meridional variations in $\delta^{15}\text{N}$ in the South gyre region

The distribution of  $\delta^{15}\text{N}$  of suspended particles ( $\delta^{15}\text{N}_{\text{sp}}$ ) and zooplankton in the South gyre region showed contrasting trends in 2007 and 2008 (Fig. 6). Even though the vertical distribution of  $\delta^{15}\text{N}_{\text{sp}}$  varied within a range of 6‰, data were <4‰ in all stations (Fig. 5) suggesting that a  $^{15}\text{N}$ -depleted source of nitrogen is contributing significantly to the signals. In autumn 2007, the general meridional pattern largely coincided with that described by Mino *et al.* (Mino *et al.*, 2002) in surface waters, but not with those given by Mahaffey *et al.* (Mahaffey *et al.*, 2004) and Reynolds *et al.* (Reynolds *et al.*, 2007), who found a general increasing trend to the South with values of >2‰. The light patch of  $\delta^{15}\text{N}_{\text{sp}}$  in the range of –2 to 0‰, which was found between 20°S and 30°S in the 2007 cruise (Fig. 6), seems to be a persistent feature also

described by Mino *et al.* (Mino *et al.*, 2002) with values close to –1‰, and Reynolds *et al.* (Reynolds *et al.*, 2007) with values close to 0‰. In contrast, this is the first time that a decreasing trend in  $\delta^{15}\text{N}$  such as the one depicted in spring 2008 has been described in this region.

The flux of atmospheric deposition of nutrients in the South Atlantic Ocean is extremely weak (Gao *et al.*, 2001; Duce *et al.*, 2008); thus, we may discard the effect of light atmospheric nitrogen in the isotopic budget. The small difference in the  $\delta^{15}\text{N}$  of both zooplankton size-fractions suggests a strong coupling between trophic levels, with low isotopic fractionation in the loss of nitrogen by excretion (Checkley and Miller, 1989). The uptake of dissolved organic nitrogen and their inorganic degradation products, originated by the nitrogen fixers and processed by microbes, may explain such coupling, as isotopic fractionation in microbial food webs is generally low (Rau *et al.*, 1990). Mahaffey *et al.* (Mahaffey *et al.*, 2004) suggested that the relatively important dissolved organic nitrogen pool of the South Atlantic could account for the high  $\delta^{15}\text{N}$  measured in their study. On the contrary, Knapp *et al.* (Knapp *et al.*, 2011) found that a long lived and poorly reactive DON pool in other regions of the Atlantic and Pacific Oceans could be a source of light ammonium through deamination. However, we propose that the supply of diazotroph nitrogen is significantly determining the observed  $\delta^{15}\text{N}_{\text{sp}}$ . The few experimental measurements performed to date in the South Atlantic show that nitrogen fixation is persistent in this region with rates in the range of 2–50  $\mu\text{mol N m}^{-2} \text{ day}^{-1}$  (Moore *et al.*, 2009; Fernández *et al.*, 2010; Grosskopf *et al.*, 2012), which are similar to those reported in the equatorial and North gyre region (Fig. 6). This suggests that nitrogen fixation could be responsible of the persistent light patch of  $\delta^{15}\text{N}_{\text{sp}}$  in the South gyre between 10°S and 30°S. The contribution of nitrogen fixation to the  $\delta^{15}\text{N}$  of suspended particles was  $49 \pm 12\%$  in 2007 and  $58 \pm 18\%$  in 2008, according to a two-end-member model based on nitrate and diazotrophy (Montoya *et al.*, 2002). Besides, the daily contribution of nitrogen fixation to the total ( $\text{N}_2$  fixation + nitrate diffusive flux) input of nitrogen to the euphotic layer was 44% during strong stratification conditions in April 2008 (Mouriño-Carballido *et al.*, 2011).

This diazotroph nitrogen was transferred to upper trophic levels with relatively high efficiency in 2008, and it represented  $36 \pm 16\%$  of the 40–200  $\mu\text{m}$  size-fraction and  $40 \pm 17\%$  of the >200  $\mu\text{m}$  size-fraction (Table IV). Hence, both experimental measurements and estimations seem to agree in that nitrogen fixation could be supporting an important fraction of primary production in the South gyre, despite the fact that the absolute rates of both processes are low.



## CONCLUSIONS

A persistent and consistent signature of low  $\delta^{15}\text{N}$  of suspended particles ( $\delta^{15}\text{N}_{\text{sp}}$ ) is found in the North gyre region ( $30^\circ\text{N}$ – $15^\circ\text{N}$ ) in both zonal and meridional transects, which is usually associated with a significant input of nitrogen fixed by diazotrophs (Mahaffey *et al.*, 2003; Reynolds *et al.*, 2007; Landrum *et al.*, 2011). However, the experimental measurements of nitrogen fixation show modest rates in comparison with other regions of the Atlantic Ocean and do not seem to support this argument. The atmospheric deposition of light nitrogen, which has increased in recent years, is likely to complete the required supply that produces this depleted  $\delta^{15}\text{N}$  signal. However, few studies have addressed the depositional and diazotrophic fluxes together (Baker *et al.*, 2007; Knapp *et al.*, 2011) and further studies are needed to accurately define the strength, frequency and isotopic composition of the atmospheric depositional flux against the flux of nitrogen fixation in the North Atlantic. The equatorial region ( $15^\circ\text{N}$ – $10^\circ\text{S}$ ) is subject to relatively intense nitrogen fixation throughout the year (Moore *et al.*, 2009; Fernández *et al.*, 2010; Grosskopf *et al.*, 2012) which may explain 40–60% of the observed  $\delta^{15}\text{N}_{\text{sp}}$  signal. However, this nitrogen of diazotrophic origin seems to be inefficiently transferred to upper trophic levels. In the South gyre, the low  $\delta^{15}\text{N}_{\text{sp}}$  and the daily estimated contribution of nitrogen fixation to the supply of new nitrogen (Mouriño-Carballido *et al.*, 2011) suggest that diazotrophs can contribute up to half of the nitrogen in phytoplankton at different time scales (Fig. 4). Even though the measured nitrogen fixation rates are low (Moore *et al.*, 2009; Fernández *et al.*, 2010; Grosskopf *et al.*, 2012), their impact in the nitrogen isotopic budget of this region may be large. Hence, a re-evaluation of the importance of diazotrophy in the South Atlantic Ocean is needed through new studies that should address the annual variability in nitrogen fixation rates as well as the distribution and relative importance of the different groups of diazotrophs.

## ACKNOWLEDGEMENTS

The authors appreciate the careful revision and thorough comments of two anonymous reviewers who helped to improve the quality of the manuscript. We thank N. Lluch and P. Chouciño for technical assistance. Stable isotopes were analysed at SXAI-Universidade da Coruña. We also thank the officers and crew of the BIO Hespérides and the staff of the Marine Technology Unit (UTM), for their support during the work at sea.

## FUNDING

A.F. was supported by grant PGIDIT05PXIC31201PN of the Xunta de Galicia. This is a contribution of the project TRYNITROP (*Trichodesmium* and  $\text{N}_2$  fixation in the tropical Atlantic Ocean) funded by the Spanish Ministry of Science and Technology through grants CTM2004-05174-C01 and CTM2004-05174-C02 to A.B. and E.M., respectively.

## REFERENCES

- Baker, A. R., Weston, K., Kelly, S. D. *et al.* (2007) Dry and wet deposition of nutrients from the tropical Atlantic atmosphere: links to primary productivity and nitrogen fixation. *Deep-Sea Res. I*, **54**, 1704–1720.
- Bauersachs, T., Schouten, S., Compaore, J. *et al.* (2009) Nitrogen isotopic fractionation associated with growth on dinitrogen gas and nitrate by cyanobacteria. *Limnol. Oceanogr.*, **54**, 1403–1411.
- Benavides, M., Agawin, N. S. R., Aristegui, J. *et al.* (2011) Nitrogen fixation by *Trichodesmium* and small diazotrophs in the subtropical north-east Atlantic. *Aquatic Microb. Ecol.*, **65**, 43–53.
- Checkley, D. M. and Miller, C. A. (1989) Nitrogen isotope fractionation by oceanic zooplankton. *Deep-Sea Res. A*, **36**, 1449–1456.
- Duce, R. A., Laroche, J., Altieri, K. *et al.* (2008) Impacts of atmospheric anthropogenic nitrogen on the open ocean. *Science*, **320**, 893–897.
- Fang, Y. T., Koba, K., Wang, X. M. *et al.* (2011) Anthropogenic imprints on nitrogen and oxygen isotopic composition of precipitation nitrate in a nitrogen-polluted city in southern China. *Atmos. Chem. Phys.*, **11**, 1313–1325.
- Fernández, A., Graña, R., Mouriño-Carballido, B. *et al.* (2013) Community  $\text{N}_2$  fixation and *Trichodesmium* spp. abundance along longitudinal gradients in the eastern subtropical North Atlantic. *ICES J. Mar. Sci.*, **70**, 223–231.
- Fernández, A., Mouriño-Carballido, B., Bode, A. *et al.* (2010) Latitudinal distribution of *Trichodesmium* spp. and  $\text{N}_2$  fixation in the Atlantic Ocean. *Biogeosciences*, **7**, 3167–3176.
- Gao, Y., Kaufman, Y. J., Tanre, D. *et al.* (2001) Seasonal distributions of aeolian iron fluxes to the global ocean. *Geophys. Res. Lett.*, **28**, 29–32.
- Glibert, P. M. and Bronk, D. A. (1994) Release of dissolved organic nitrogen by marine diazotrophic cyanobacteria, *Trichodesmium* spp. *Appl. Environ. Microbiol.*, **60**, 3996–4000.
- Grosskopf, T., Mohr, W., Baustian, T. *et al.* (2012) Doubling of marine dinitrogen fixation rates based on direct measurements. *Nature*, **488**, 361–364.
- Gruber, N. and Sarmiento, J. L. (1997) Global patterns of marine nitrogen fixation and denitrification. *Global Biogeochem. Cycles*, **11**, 235–266.
- Hansell, D. A., Bates, N. R. and Olson, D. B. (2004) Excess nitrate and nitrogen fixation in the North Atlantic Ocean. *Mar. Chem.*, **84**, 243–265.
- Hastings, M. G., Jarvis, J. C. and Steig, E. J. (2009) Anthropogenic impacts on nitrogen isotopes of ice-core nitrate. *Science*, **324**, 1288.
- Hawser, S. P., Oneil, J. M., Roman, M. R. *et al.* (1992) Toxicity of blooms of the cyanobacterium *Trichodesmium* to zooplankton. *J. Appl. Phycol.*, **4**, 79–86.
- Heaton, T. H. E. (1990)  $^{15}\text{N}/^{14}\text{N}$  ratios of  $\text{NO}_x$  from vehicle engines and coal-fired power stations. *Tellus Ser. B*, **42**, 304–307.

- Holtgrieve, G. W., Schindler, D. E., Hobbs, W. O. *et al.* (2011) A Coherent signature of anthropogenic nitrogen deposition to remote watersheds of the Northern Hemisphere. *Science*, **334**, 1545–1548.
- Karl, D. M., Michaels, A., Bergman, B. *et al.* (2002) Dinitrogen fixation in the world's oceans. *Biogeochemistry*, **57**, 47–98.
- Kiga, T., Yoshikawa, K., Tsunogai, U. *et al.*; American Society of Mechanical Engineers. (2000) Evaluation of NO<sub>x</sub> formation in pulverized coal firing by use of nitrogen isotope ratios. Proceedings of the 2000 International Joint Power Generation Conference. American Society of Mechanical Engineers, Miami Beach, FL, 23–26 July.
- Knapp, A. N., Hastings, M. G., Sigman, D. M. *et al.* (2010) The flux and isotopic composition of reduced and total nitrogen in Bermuda rain. *Mar. Chem.*, **120**, 83–89.
- Knapp, A. N., Sigman, D. M., Lipschultz, F. *et al.* (2011) Interbasin isotopic correspondence between upper-ocean bulk DON and subsurface nitrate and its implications for marine nitrogen cycling. *Global Biogeochem. Cycles*, **25**, GB4004. doi:10.1029/2010GB003878.
- Landrum, J. P., Altabet, M. A. and Montoya, J. P. (2011) Basin-scale distributions of stable nitrogen isotopes in the subtropical North Atlantic Ocean: contribution of diazotroph nitrogen to particulate organic matter and mesozooplankton. *Deep-Sea Res. I*, **58**, 615–625.
- Liu, K. K. and Kaplan, I. R. (1989) The eastern tropical Pacific as a source of <sup>15</sup>N-enriched nitrate in seawater off southern California. *Limnol. Oceanogr.*, **34**, 820–830.
- Luo, Y. W., Doney, S. C., Anderson, L. A. *et al.* (2012) Database of diazotrophs in global ocean: abundances, biomass and nitrogen fixation rates. *Earth Syst. Sci. Data*, **4**, 47–73.
- Mahaffey, C., Williams, R. G., Wolff, G. A. *et al.* (2003) Biogeochemical signatures of nitrogen fixation in the eastern North Atlantic. *Geophys. Res. Lett.*, **30**, 1300. doi:10.1029/2002GL016542.
- Mahaffey, C., Williams, R. G., Wolff, G. A. *et al.* (2004) Physical supply of nitrogen to phytoplankton in the Atlantic Ocean. *Global Biogeochem. Cycles*, **18**, GB1034. doi:10.1029/2003GB002129.
- Mara, P., Mihalopoulos, N., Gogou, A. *et al.* (2009) Isotopic composition of nitrate in wet and dry atmospheric deposition on Crete in the eastern Mediterranean Sea. *Global Biogeochem. Cycles*, **23**, GB4002. doi:10.1029/2008GB003395.
- Minagawa, M. and Wada, E. (1984) Stepwise enrichment of <sup>15</sup>N along food chains: further evidence and the relation between <sup>15</sup>N and animal age. *Geochim. Cosmochim. Acta*, **48**, 1135–1140.
- Mino, Y., Saino, T., Suzuki, K. *et al.* (2002) Isotopic composition of suspended particulate nitrogen ( $\delta^{15}\text{N}_{\text{sus}}$ ) in surface waters of the Atlantic Ocean from 50°N to 50°S. *Global Biogeochem. Cycles*, **16**, 1059. doi:10.1029/2001GB001635.
- Miyake, Y. and Wada, E. (1967) The abundance ratio of <sup>15</sup>N/<sup>14</sup>N in marine environments. *Rec. Oceanogr. Works Jpn.*, **9**, 37–53.
- Mompeán, C., Bode, A., Benítez-Barrios, V. M. *et al.* (2013) Spatial patterns of plankton biomass and stable isotopes reflect the influence of the nitrogen-fixer *Trichodesmium* along the subtropical North Atlantic. *J. Plankton Res.*, **35**, 513–525.
- Montoya, J. P. (2007) Natural abundance of <sup>15</sup>N in marine planktonic ecosystems. In Michener, R. and Lajtha, K. (eds), *Stable Isotopes in Ecology and Environmental Science*. Blackwell Publishing Ltd., Malden, pp. 176–201.
- Montoya, J. P. (2008) Nitrogen stable isotopes in marine environments. In Capone, D. G., Bronk, D. A., Mulholland, M. R. and Carpenter, E. J. (eds), *Nitrogen in the Marine Environment*. Elsevier, Inc., London. pp. 1277–1302.
- Montoya, J. P., Carpenter, E. J. and Capone, D. G. (2002) Nitrogen fixation and nitrogen isotope abundances in zooplankton of the oligotrophic North Atlantic. *Limnol. Oceanogr.*, **47**, 1617–1628.
- Montoya, J. P., Voss, M., Kahler, P. *et al.* (1996) A simple, high-precision, high-sensitivity tracer assay for N<sub>2</sub> fixation. *Appl. Environ. Microbiol.*, **62**, 986–993.
- Moore, C. M., Mills, M. M., Achterberg, E. P. *et al.* (2009) Large-scale distribution of Atlantic nitrogen fixation controlled by iron availability. *Nat. Geosci.*, **2**, 867–871.
- Moore, C. M., Mills, M. M., Arrigo, K. R. *et al.* (2013) Processes and patterns of oceanic nutrient limitation. *Nat. Geosci.*, **6**, 701–710.
- Morin, S., Savarino, J., Frey, M. M. *et al.* (2009) Comprehensive isotopic composition of atmospheric nitrate in the Atlantic Ocean boundary layer from 65 degrees S to 79 degrees N. *J. Geophys. Res. D*, **114**, D05303. doi:10.1029/2008JD010696.
- Mouriño-Carballido, B., Graña, R., Fernández, A. *et al.* (2011) Importance of N<sub>2</sub> fixation vs. nitrate eddy diffusion along a latitudinal transect in the Atlantic Ocean. *Limnol. Oceanogr.*, **56**, 999–1007.
- Mulholland, M. R. (2007) The fate of nitrogen fixed by diazotrophs in the ocean. *Biogeosciences*, **4**, 37–51.
- O'Neil, J. M., Metzler, P. M. and Glibert, P. M. (1996) Ingestion of <sup>15</sup>N<sub>2</sub>-labelled *Trichodesmium* spp and ammonium regeneration by the harpacticoid copepod *Macrosetella gracilis*. *Mar. Biol.*, **125**, 89–96.
- O'Neil, J. M. and Roman, M. R. (1994) Ingestion of the cyanobacterium *Trichodesmium* spp.: by pelagic harpacticoid copepods *Macrosetella*, *Miracia* and *Oculostella*. *Hydrobiologia*, **293**, 235–240.
- Paerl, H. W. and Zehr, J. P. (2000) Marine nitrogen fixation. In Kirchman, D. L. (ed.), *Microbial Ecology of the Oceans*. Wiley-Liss, Inc., Wilmington, pp. 387–426.
- Rau, G. H., Teyssie, J. L., Rassoulzadegan, F. *et al.* (1990) <sup>13</sup>C/<sup>12</sup>C and <sup>15</sup>N/<sup>14</sup>N variations among size-fractionated marine particles—implications for their origin and trophic relationships. *Mar. Ecol. Prog. Ser.*, **59**, 33–38.
- Rees, A. P., Gilbert, J. A. and Kelly-Gerreyn, B. A. (2009) Nitrogen fixation in the western English Channel (NE Atlantic Ocean). *Mar. Ecol. Prog. Ser.*, **374**, 7–12.
- Reynolds, S. E., Mather, R. L., Wolff, G. A. *et al.* (2007) How widespread and important is N<sub>2</sub> fixation in the North Atlantic Ocean? *Global Biogeochemical Cycles*, **21**, GB4015. doi:10.1029/2006GB002886.
- Sigman, D. M., Altabet, M. A., Michener, R. *et al.* (1997) Natural abundance-level measurement of the nitrogen isotopic composition of oceanic nitrate: an adaptation of the ammonia diffusion method. *Mar. Chem.*, **57**, 227–242.
- Tyrrell, T., Marañón, E., Poulton, A. J. *et al.* (2003) Large-scale latitudinal distribution of *Trichodesmium* spp. in the Atlantic Ocean. *J. Plankton Res.*, **25**, 405–416.
- Vitousek, P. M. and Howarth, R. W. (1991) Nitrogen limitation on land and in the sea—how can it occur. *Biogeochemistry*, **13**, 87–115.
- Wannicke, N., Liskow, I. and Voss, M. (2010) Impact of diazotrophy on N stable isotope signatures of nitrate and particulate organic nitrogen: case studies in the north-eastern tropical Atlantic Ocean. *Isotopes Environ. Health Stud.*, **46**, 337–354.
- Waser, N. A., Harrison, W. G., Head, E. J. H. *et al.* (2000) Geographic variations in the nitrogen isotope composition of surface particulate nitrogen and new production across the North Atlantic Ocean. *Deep-Sea Res. I*, **47**, 1207–1226.
- Weiss, R. F. (1970) The solubility of nitrogen, oxygen and argon in water and seawater. *Deep-Sea Res.*, **17**, 721–735.
